# Supplementary material for: A systematic study of long-range ordered 3D-SBA-15 materials by electron tomography
Source: Royal Society of Chemistry journal article supplement (doi:10.1039/c1nj20146h), 2011-01-01
Supplement: c1nj20146h.pdf [file c1nj20146h.pdf]

# Supporting Information

## A Systematic Study of Long-range Ordered 3D-SBA-15 Materials by Electron Tomography

Pei Yuan,<sup>a,b†</sup> Lei Tan,<sup>b†</sup> Dahai Pan,<sup>c</sup> Yanan Guo,<sup>d</sup> Liang Zhou,<sup>b</sup> Jie Yang,<sup>a</sup> Jin Zou,<sup>d</sup> Chengzhong Yu<sup>\*a</sup>

<sup>a</sup> ARC Centre of Excellence for Functional Nanomaterials and Australian Institute for Bioengineering and Nanotechnology, The University of Queensland, Brisbane, QLD 4072, Australia, Fax: +61-7-334 63973; Tel: +61-7-334 63283; E-mail: c.yu@uq.edu.au

<sup>b</sup> Department of Chemistry and Shanghai Key Laboratory of Molecular Catalysis and Innovative Materials, Fudan University, Shanghai, 200433, P. R. China

<sup>c</sup> College of Chemistry and Chemical Engineering, Taiyuan University of Technology, Taiyuan 030024, P. R. China

<sup>d</sup> Materials Engineering and Centre for Microscopy and Microanalysis, University of Queensland, QLD 4072, Australia

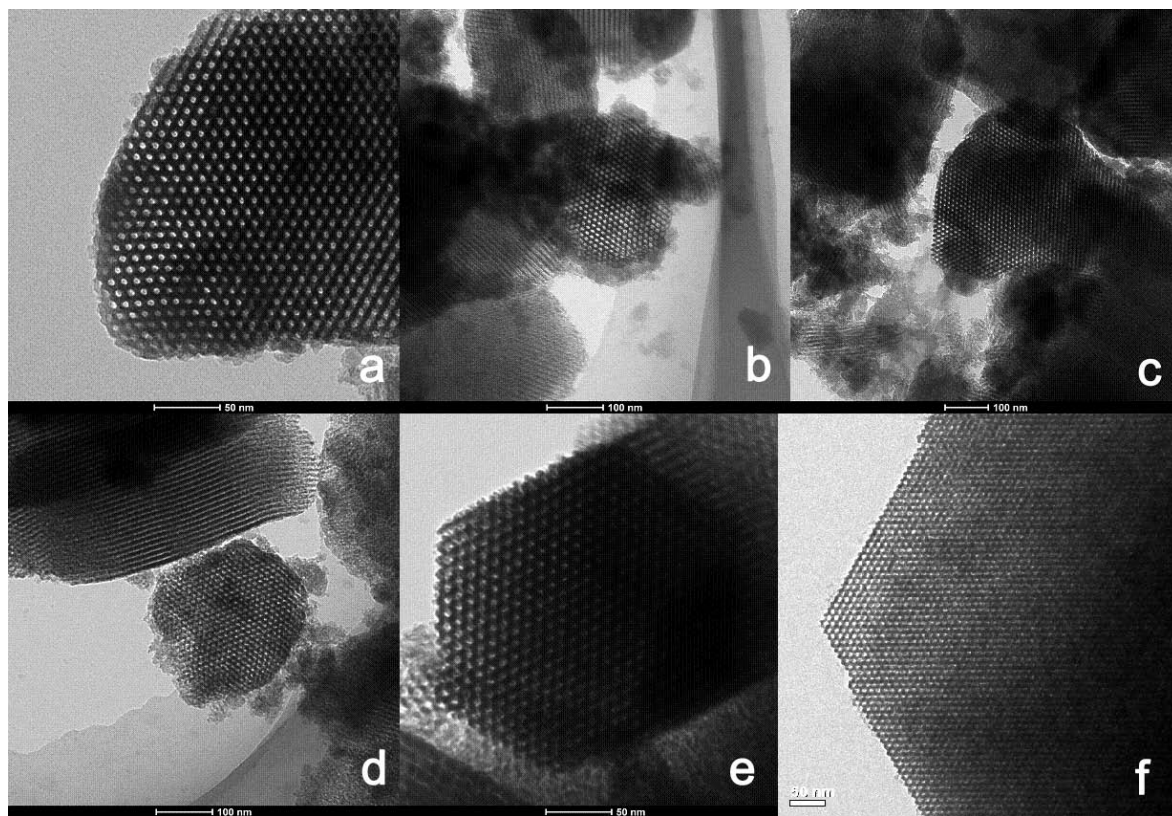

**Figure S1.** TEM images of the calcined samples synthesized under different hydrothermal temperatures: S-100 (a); S-160 (b); S-170 (c); S-180 (d); S-190 (e); S-200 (f).

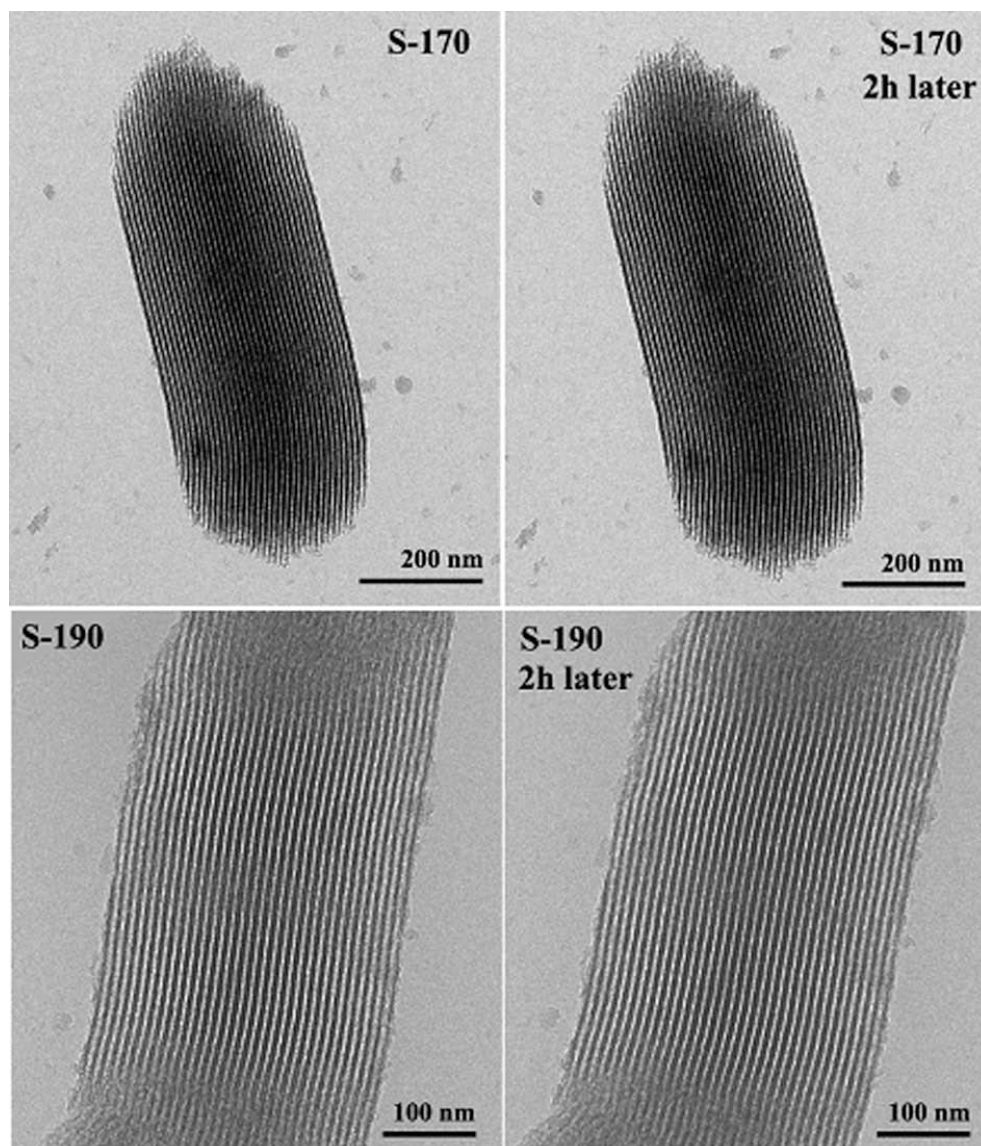

**Figure S2.** TEM images of two typical rods from S-170, S-190, respectively, taken before and after 2h exposure under the electron beam with the same microscopy condition.

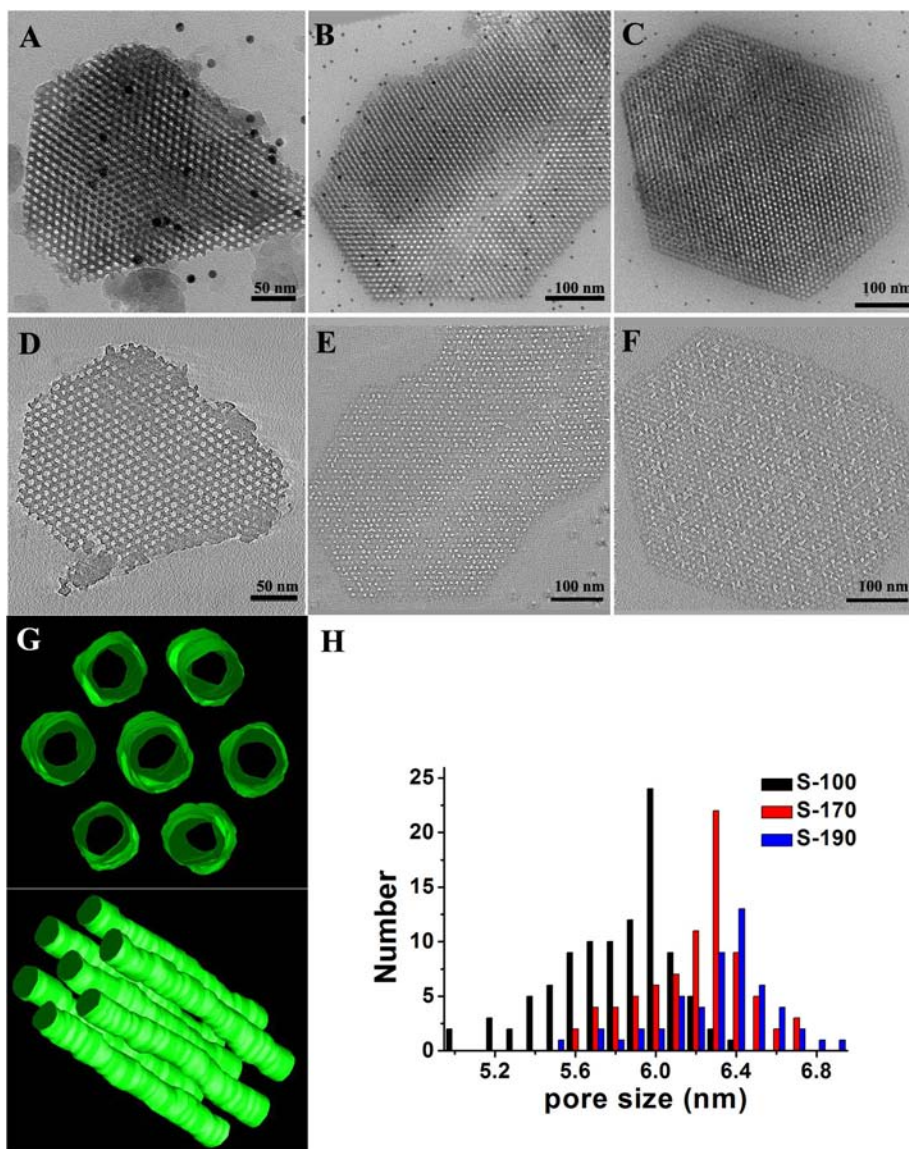

**Figure S3.** The TEM images taken along [001] direction and their corresponding ET slice images for the calcined samples synthesized under different hydrothermal temperatures: 100 °C (A, D); 170 °C (B, E); 190 °C (C, F), respectively. The size of gold fiducial markers in (A) is 10 nm and in (B, C) is 5 nm. (G) is the reconstructed models for S-100 showing the regular and well-arranged mesopores with ordered hexagonal mesostructure. The average size of regularly arrayed channels without obvious merging measured from the ET slices for S-100 (black), S-170 (red), and S-190 (blue) is ~ 6.0, 6.3, and 6.4 nm, respectively (G). The numbers of pores are 100, 80, and 53 for S-100, S-170, and S-190, respectively.



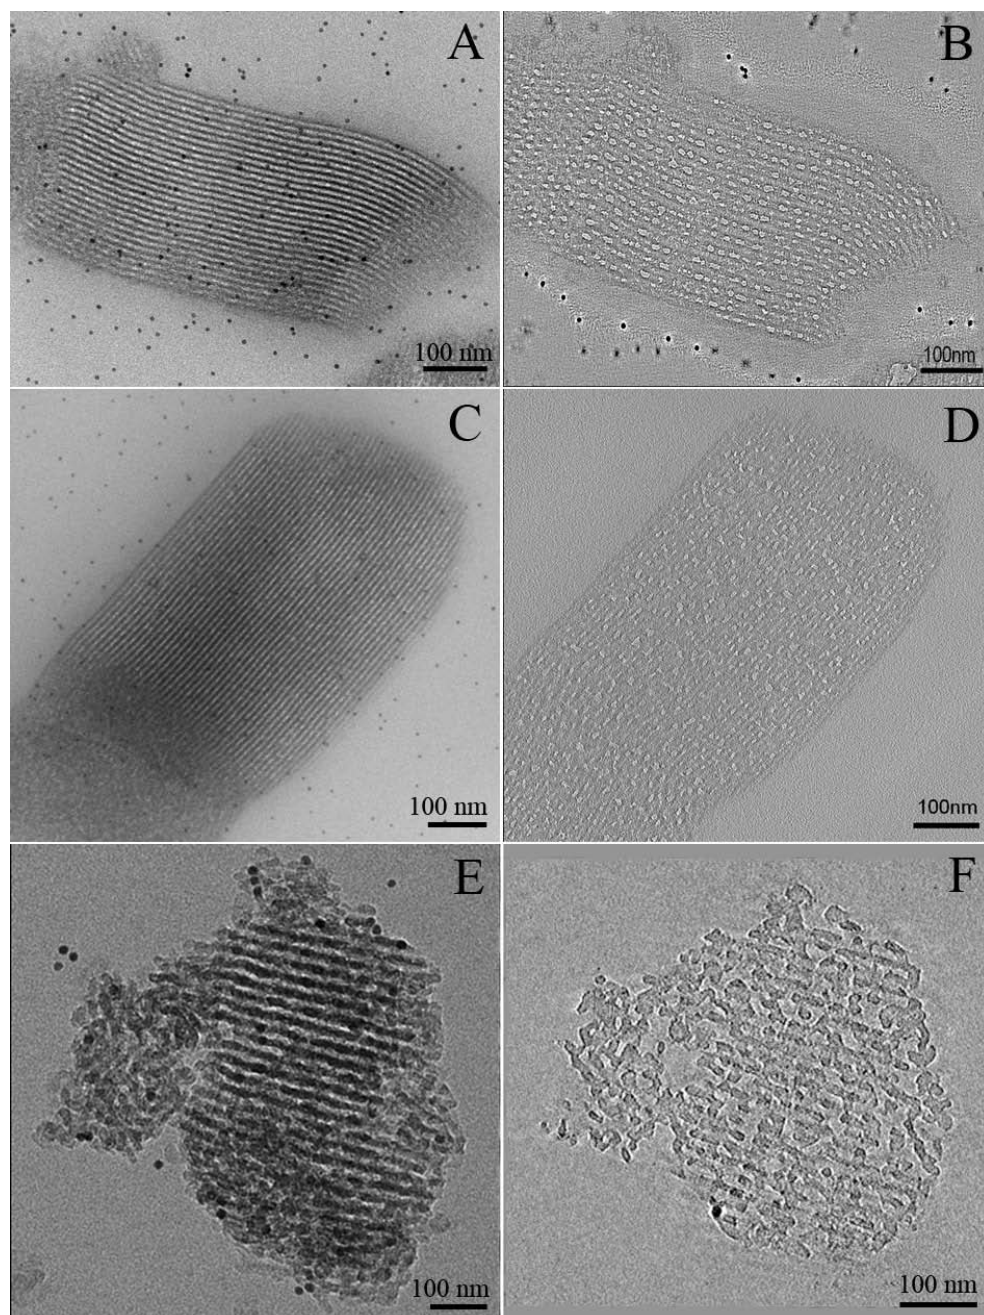

**Figure S4.** The TEM images taken along [110] direction and their corresponding ET slice images for the calcined samples synthesized under different hydrothermal temperatures: 170 °C (A, B); 190 °C (C, D); 200 °C (E, F), respectively.

## Calculation of the $\Phi$ value

$\Phi$  is the percentage of the pore volume of pores with pore size ( $P_a$ ) larger than  $a_0$  versus the total pore volume ( $V_T$ ), which is calculated from the cumulative pore volume curve. Taken S-190 for example, Figure S5 shows the cumulative pore volume curve (red) and pore size distribution (blue) obtained from the BJH model. When  $P_a$  is equal to  $a_0$  (11.2 nm) where the cumulative pore volume is  $V'$  (0.36), the pore volume of pores with  $P_a$  larger than  $a_0$  is  $V_T - V' = 0.46$  ( $V_T$  is 0.82), so  $\Phi = 0.46/0.82 = 0.56$ .

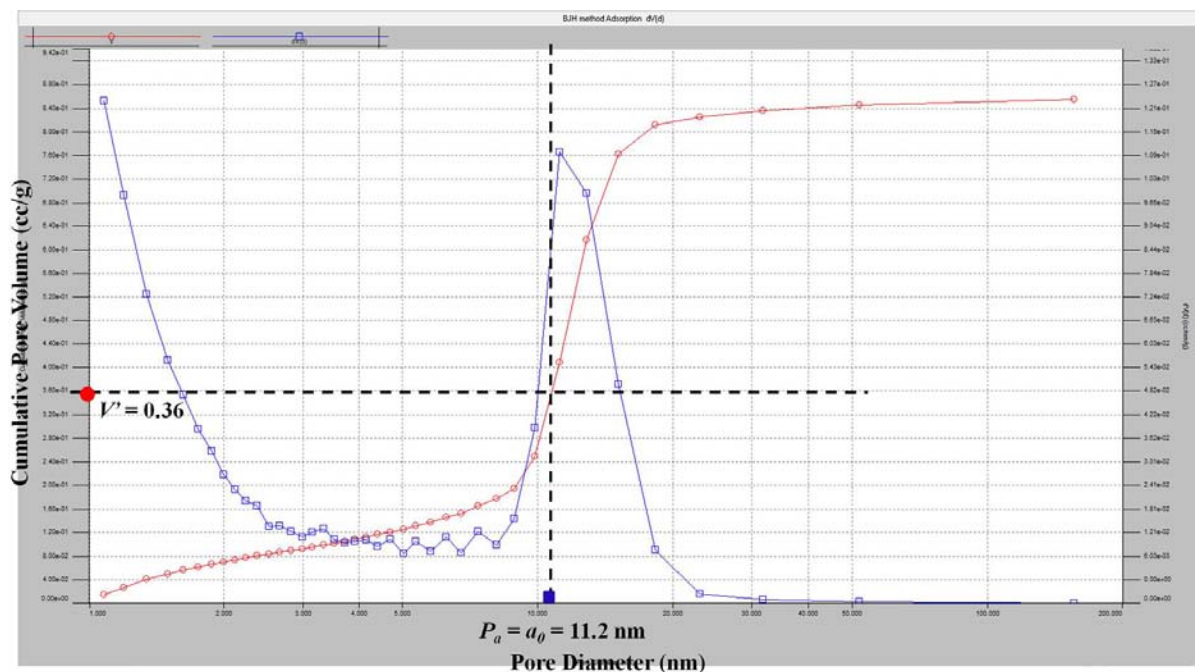

**Figure S5.** BJH model adsorption from nitrogen sorption of S-190: cumulative pore volume curve (red) and pore size distribution (blue). The blue square (solid) in x-axis is the point where  $P_a = a_0 = 11.2$  nm and the red circle (solid) in left y-axis is the cumulative pore volume when the pore size reaches 11.2 nm.
